# Supplementary material for: Water extract ofFerula lehmanni Boiss.prevents high-fat diet-induced overweight and liver injury by modulating the intestinal microbiota in mice
Source: Royal Society of Chemistry journal article supplement (doi:10.1039/d1fo03518e), 2022-01-01
Supplement: d1fo03518e2.pdf [file d1fo03518e2.pdf]

Table S1 Polyphenols of WEFL samples determined by UPLC-MS/MS.

| Compounds                                           | CAS         | Formula                | Ionization         |           |
|-----------------------------------------------------|-------------|------------------------|--------------------|-----------|
|                                                     |             |                        | model              | Peak area |
| <b>Alkaloids</b>                                    |             |                        |                    |           |
| 4-hydroxy-5-(2-oxo-1-pyrrolidinyl)-benzoic acid     | -           | C9H11NO3               | [M+H] <sup>+</sup> | 2.70E+07  |
| Histidinol                                          | 501-28-0    | C6H11N3O               | [M+H] <sup>+</sup> | 2.41E+07  |
| Indole-3-carboxylic acid*                           | 771-50-6    | C9H7NO2                | [M-H] <sup>-</sup> | 2.35E+07  |
| Spermine                                            | 71-44-3     | C10H26N4               | [M+H] <sup>+</sup> | 2.34E+07  |
| Indole-3-carboxaldehyde                             | 487-89-8    | C9H7NO                 | [M+H] <sup>+</sup> | 2.08E+07  |
| N-Benzylmethylene isomethylamine                    | -           | C8H9N                  | [M+H] <sup>+</sup> | 1.86E+07  |
| Methoxyindoleacetic acid                            | 3471-31-6   | C11H11NO3              | [M+H] <sup>+</sup> | 1.83E+07  |
| 6-Deoxyfagomine                                     | 197449-09-5 | C6H13NO2               | [M+H] <sup>+</sup> | 1.68E+07  |
| 1-Methoxy-indole-3-acetamide                        | -           | C11H12N2O2             | [M+H] <sup>+</sup> | 1.66E+07  |
| Indole-5-carboxylic acid*                           | 1670-81-1   | C9H7NO2                | [M-H] <sup>-</sup> | 1.46E+07  |
| Piperidine                                          | 110-89-4    | C5H11N                 | [M+H] <sup>+</sup> | 1.40E+07  |
| Stachydrine                                         | 471-87-4    | C7H13NO2               | [M+H] <sup>+</sup> | 1.27E+07  |
| Phenethylamine                                      | 64-04-0     | C8H11N                 | [M+H] <sup>+</sup> | 1.26E+07  |
| Dihydroisopelletierine                              | -           | C8H17NO                | [M+H] <sup>+</sup> | 1.03E+07  |
| Tryptamine                                          | 61-54-1     | C10H12N2               | [M+H] <sup>+</sup> | 8.50E+06  |
| N-benzylformamide                                   | 6343-54-0   | C8H9NO                 | [M+H] <sup>+</sup> | 7.70E+06  |
| Betaine                                             | 107-43-7    | C5H11NO2               | [M+H] <sup>+</sup> | 6.65E+06  |
| N-Acetylisatin                                      | 574-17-4    | C10H7NO3               | [M-H] <sup>-</sup> | 6.05E+06  |
| Caffeoylcholine                                     | 87189-10-4  | C14H20NO4 <sup>+</sup> | [M] <sup>+</sup>   | 5.41E+06  |
| Gramine                                             | 87-52-5     | C11H14N2               | [M+H] <sup>+</sup> | 4.18E+06  |
| Ailanindole                                         | 159903-51-2 | C12H8N2O2              | [M+H] <sup>+</sup> | 3.67E+06  |
| Caffeine                                            | 58-08-2     | C8H10N4O2              | [M+H] <sup>+</sup> | 3.43E+06  |
| Feruloylcholine glucoside                           | -           | C21H32NO9 <sup>+</sup> | [M] <sup>+</sup>   | 3.08E+06  |
| 7-Hydroxy-beta-carboline-1-propionic acid           | 215934-15-9 | C14H12N2O3             | [M+H] <sup>+</sup> | 2.99E+06  |
| 1-Acetyl-β-carboline                                | -           | C13H10N2O              | [M+H] <sup>+</sup> | 2.88E+06  |
| Serotonin                                           | 50-67-9     | C10H12N2O              | [M+H] <sup>+</sup> | 2.88E+06  |
| Pterolactam                                         | 38072-88-7  | C5H9NO2                | [M+H] <sup>+</sup> | 2.54E+06  |
| N-Hydroxytryptamine                                 | -           | C10H12N2O              | [M+H] <sup>+</sup> | 2.39E+06  |
| L-Carnitine                                         | 541-15-1    | C7H15NO3               | [M+H] <sup>+</sup> | 1.72E+06  |
| Acetylcholine                                       | 60-31-1     | C7H16NO2               | [M+H] <sup>+</sup> | 1.62E+06  |
| 4,5,6-Trihydroxy-2-cyclohexen-1-ylideneacetonitrile | -           | C8H9NO3                | [M+H] <sup>+</sup> | 1.51E+06  |
| 4-Hydroxymandelonitrile                             | 13093-65-7  | C8H7NO2                | [M+H] <sup>+</sup> | 1.46E+06  |
| Indole                                              | 120-72-9    | C8H7N                  | [M+H] <sup>+</sup> | 1.26E+06  |
| 3-Hydroxypyridine                                   | 109-00-2    | C5H5NO                 | [M+H] <sup>+</sup> | 1.21E+06  |
| N-Acetyl-5-hydroxytryptamine                        | 1210-83-9   | C12H14N2O2             | [M+H] <sup>+</sup> | 1.18E+06  |
| Phenylethanolamine                                  | 7568-93-6   | C8H11NO                | [M+H] <sup>+</sup> | 1.14E+06  |
| Choline                                             | 62-49-7     | C5H13NO                | [M+H] <sup>+</sup> | 1.11E+06  |
| 3-Indoleacetonitrile                                | 771-51-7    | C10H8N2                | [M+H] <sup>+</sup> | 9.82E+05  |
| Cadaverine                                          | 462-94-2    | C5H14N2                | [M+H] <sup>+</sup> | 9.41E+05  |

|                                                                     |             |                        |                    |          |
|---------------------------------------------------------------------|-------------|------------------------|--------------------|----------|
| Acetryptine                                                         | 3551-18-6   | C12H14N2O              | [M+H] <sup>+</sup> | 8.83E+05 |
| N-Feruloyltyramine                                                  | 66648-43-9  | C18H19NO4              | [M+H] <sup>+</sup> | 8.56E+05 |
| Feruloylcholine                                                     | 85927-25-9  | C15H22NO4 <sup>+</sup> | [M] <sup>+</sup>   | 8.08E+05 |
| Indole 3-acetic acid (IAA)                                          | 87-51-4     | C10H9NO2               | [M+H] <sup>+</sup> | 7.92E+05 |
| 5-Hydroxyindole-3-acetic acid                                       | 54-16-0     | C10H9NO3               | [M-H] <sup>-</sup> | 6.05E+05 |
| N',N'',N'''-p-Coumaroyl-cinnamoyl-caffeoyl<br>spermidine            | -           | C34H37N3O6             | [M+H] <sup>+</sup> | 4.48E+05 |
| 2-(D-Glucosyloxy)-4-hydroxybenzeneacetonitrile                      | -           | C14H17NO7              | [M-H] <sup>-</sup> | 3.91E+05 |
| Dihydrocaffeoylputrescine                                           | -           | C13H20N2O3             | [M+H] <sup>+</sup> | 3.45E+05 |
| Cocamidopropyl betaine                                              | 4292-10-8   | C19H38N2O3             | [M+H] <sup>+</sup> | 3.42E+05 |
| 3-Indolepropionic acid                                              | 830-96-6    | C11H11NO2              | [M+H] <sup>+</sup> | 2.93E+05 |
| Putrescine                                                          | 110-60-1    | C4H12N2                | [M+H] <sup>+</sup> | 2.85E+05 |
| N-Trans-Feruloyl-3'-O-methyl dopamine                               | -           | C19H21NO5              | [M+H] <sup>+</sup> | 2.83E+05 |
| N-Feruloyl-3-methoxytyramine                                        | 78510-19-7  | C19H21NO5              | [M+H] <sup>+</sup> | 2.54E+05 |
| Nicotinic Acid Methyl Ester(Methyl Nicotinate)                      | 93-60-7     | C7H7NO2                | [M+H] <sup>+</sup> | 2.53E+05 |
| 3-Hydroxyanthranilic acid                                           | 548-93-6    | C7H7NO3                | [M+H] <sup>+</sup> | 2.48E+05 |
| N-Oleolethanolamine                                                 | 111-58-0    | C20H39NO2              | [M+H] <sup>+</sup> | 2.22E+05 |
| 2-Aminophenol                                                       | 95-55-6     | C6H7NO                 | [M+H] <sup>+</sup> | 2.06E+05 |
| N-Acetylputrescine                                                  | 18233-70-0  | C6H14N2O               | [M+H] <sup>+</sup> | 1.74E+05 |
| 4-Coumaroylcholine                                                  | -           | C14H20NO3 <sup>+</sup> | [M] <sup>+</sup>   | 1.69E+05 |
| N-Feruloylputrescine                                                | 501-13-3    | C14H20N2O3             | [M+H] <sup>+</sup> | 1.63E+05 |
| Indole-3-butyric acid                                               | 133-32-4    | C12H13NO2              | [M-H] <sup>-</sup> | 1.47E+05 |
| N,N'-Diferuloylputrescine                                           | 42369-86-8  | C24H28N2O6             | [M+H] <sup>+</sup> | 1.27E+05 |
| Camalexin                                                           | 135531-86-1 | C11H8N2S               | [M+H] <sup>+</sup> | 1.18E+05 |
| Trigonelline                                                        | 535-83-1    | C7H7NO2                | [M+H] <sup>+</sup> | 1.16E+05 |
| 2,4-Dihydroxyquinoline                                              | 86-95-3     | C9H7NO2                | [M+H] <sup>+</sup> | 9.74E+04 |
| Dihydroferuloylputrescine                                           | -           | C14H22N2O3             | [M+H] <sup>+</sup> | 9.70E+04 |
| 3,5-Bis(3-methoxy-4-hydroxyphenyl)-2,3-dihydro-<br>2(1H)-pyridinone | -           | C19H19NO5              | [M+H] <sup>+</sup> | 9.14E+04 |
| Lumichrome                                                          | 1086-80-2   | C12H10N4O2             | [M+H] <sup>+</sup> | 7.61E+04 |
| Tryptophol                                                          | 526-55-6    | C10H11NO               | [M-H] <sup>-</sup> | 7.46E+04 |
| N-Feruloylhydroxyputrescine                                         | -           | C14H20N2O4             | [M+H] <sup>+</sup> | 7.38E+04 |
| O-Phosphocholine                                                    | 107-73-3    | C5H15NO4P <sup>+</sup> | [M] <sup>+</sup>   | 7.29E+04 |
| N-Feruloyl-Cadaverine                                               | -           | C15H22N2O3             | [M+H] <sup>+</sup> | 5.40E+04 |
| Nicotine-N-glucoside                                                | 911474-72-1 | C19H20N2O3             | [M+H] <sup>+</sup> | 5.38E+04 |
| N-p-Coumaroylhydroxyagmatine                                        | -           | C14H20N4O3             | [M-H] <sup>-</sup> | 4.70E+04 |
| Anabasine-glucoside                                                 | -           | C16H24O5N2             | [M+H] <sup>+</sup> | 4.60E+04 |
| N'-p-Coumaroylagmatine-glucoside                                    | -           | C20H30O7N4             | [M+H] <sup>+</sup> | 4.58E+04 |
| N-Cinnamoylserotonin                                                | -           | C19H18N2O2             | [M+H] <sup>+</sup> | 4.55E+04 |
| Stearamide                                                          | 124-26-5    | C18H37NO               | [M+H] <sup>+</sup> | 4.53E+04 |
| p-Coumaroylputrescine                                               | 34136-53-3  | C13H18N2O2             | [M+H] <sup>+</sup> | 4.20E+04 |
| 2-Glucosyl-glucosyloxy-2-phenylacetic acid amide                    | -           | C20H29NO12             | [M-H] <sup>-</sup> | 4.04E+04 |
| Dihydrocaffeoyltyramine                                             | -           | C17H19NO4              | [M+H] <sup>+</sup> | 3.46E+04 |
| 1-Methoxyindole-3-carbaldehyde                                      | 67282-55-7  | C10H9NO2               | [M+H] <sup>+</sup> | 3.32E+04 |

|                                                   |            |                        |                        |          |
|---------------------------------------------------|------------|------------------------|------------------------|----------|
| Quinine                                           | 130-95-0   | C20H24O2N2             | [M+H] <sup>+</sup>     | 3.16E+04 |
| 3-(2-(Methylamino)ethyl)-1H-indol-5-ol            | 1134-01-6  | C11H14N2O              | [M+H] <sup>+</sup>     | 3.05E+04 |
| Diferuloylcadaverine                              | -          | C25H30N2O6             | [M+H] <sup>+</sup>     | 2.93E+04 |
| N1,N8-Bis(sinapoyl)spermidine                     | -          | C29H39N3O8             | [M+H] <sup>+</sup>     | 2.84E+04 |
| 3-O-Acetylhamayne                                 | -          | C18H19NO5              | [M-H] <sup>-</sup>     | 2.84E+04 |
| Dopamine                                          | 51-61-6    | C8H11NO2               | [M+H] <sup>+</sup>     | 2.52E+04 |
| cis-N-p-Coumaroyltyramine                         | -          | C17H17NO3              | [M+H] <sup>+</sup>     | 2.27E+04 |
| Azetidine-2-carboxylic acid                       | 2517-04-6  | C4H7NO2                | [M+H] <sup>+</sup>     | 1.77E+04 |
| Indole-2-carboxylic acid*                         | 1477-50-5  | C9H7NO2                | [M-H] <sup>-</sup>     | 1.71E+04 |
| Caffeoylcholine-4-O-glucoside                     | -          | C20H30NO9 <sup>+</sup> | [M] <sup>+</sup>       | 1.68E+04 |
| 5-Aminocycloheptane-1,2,3-triol                   | -          | C7H15NO3               | [M+H] <sup>+</sup>     | 1.22E+04 |
| Agmatine                                          | 306-60-5   | C5H14N4                | [M+H] <sup>+</sup>     | 7.11E+03 |
| 1-Methylhistamine                                 | 501-75-7   | C6H11N3                | [M+H] <sup>+</sup>     | 5.99E+03 |
| <b>Phenolic acids</b>                             |            |                        |                        |          |
| 3,4-Dihydroxybenzoic acid (Protocatechuic acid)*  | 99-50-3    | C7H6O4                 | [M-H] <sup>-</sup>     | 3.91E+07 |
| 3-Hydroxybenzoic Acid                             | 99-06-9    | C7H6O3                 | [M-H] <sup>-</sup>     | 3.74E+07 |
| 2,5-Dihydroxybenzaldehyde                         | 1194-98-5  | C7H6O3                 | [M-H] <sup>-</sup>     | 3.64E+07 |
| Salicylic acid                                    | 69-72-7    | C7H6O3                 | [M-H] <sup>-</sup>     | 3.51E+07 |
| 2,3-Dihydroxybenzoic Acid*                        | 303-38-8   | C7H6O4                 | [M-H] <sup>-</sup>     | 3.39E+07 |
| Protocatechualdehyde                              | 139-85-5   | C7H6O3                 | [M-H] <sup>-</sup>     | 3.37E+07 |
| Benzamide                                         | 55-21-0    | C7H7NO                 | [M+H] <sup>+</sup>     | 2.44E+07 |
| Dibutyl phthalate                                 | 84-74-2    | C16H22O4               | [M+H] <sup>+</sup>     | 2.05E+07 |
| 2,5-Dihydroxybenzoic acid; Gentisic Acid*         | 490-79-9   | C7H6O4                 | [M-H] <sup>-</sup>     | 2.02E+07 |
| 5-O-Feruloylquinic acid*                          | -          | C17H20O9               | [2M-H] <sup>-</sup>    | 1.94E+07 |
| 2-Phenylethanol                                   | 60-12-8    | C8H10O                 | [M+H-H2O] <sup>+</sup> | 1.86E+07 |
| Chlorogenic acid (3-O-Caffeoylquinic acid)*       | 327-97-9   | C16H18O9               | [M-H] <sup>-</sup>     | 1.56E+07 |
| Cryptochlorogenic acid (4-O-Caffeoylquinic acid)* | 905-99-7   | C16H18O9               | [M-H] <sup>-</sup>     | 1.49E+07 |
| Anthranilic Acid                                  | 118-92-3   | C7H7NO2                | [M+H] <sup>+</sup>     | 1.17E+07 |
| Dicaffeoylshikimic acid                           | -          | C25H22O11              | [M+H] <sup>+</sup>     | 1.14E+07 |
| 4-Nitrophenol                                     | 100-02-7   | C6H5NO3                | [M+H] <sup>+</sup>     | 1.09E+07 |
| 1-O-Salicyl-D-glucose                             | 60517-74-0 | C13H16O8               | [M-H] <sup>-</sup>     | 1.06E+07 |
| Glucosyloxybenzoic acid                           | -          | C13H16O8               | [M-H] <sup>-</sup>     | 1.02E+07 |
| Vanillin                                          | 121-33-5   | C8H8O3                 | [M-H] <sup>-</sup>     | 9.04E+06 |
| Vanillic acid                                     | 121-34-6   | C8H8O4                 | [M-H] <sup>-</sup>     | 8.09E+06 |
| Isochlorogenic acid C*                            | 57378-72-0 | C25H24O12              | [M-H] <sup>-</sup>     | 7.55E+06 |
| 1-O-[(E)-p-Coumaroyl]-D-glucose*                  | -          | C15H18O8               | [M-H] <sup>-</sup>     | 7.47E+06 |
| Coniferyl alcohol                                 | 458-35-5   | C10H12O3               | [M-H] <sup>-</sup>     | 7.33E+06 |
| 3-(4-Hydroxyphenyl)-propionic acid                | 501-97-3   | C9H10O3                | [M-H] <sup>-</sup>     | 7.03E+06 |
| 1,3-O-Dicaffeoylquinic Acid (Cynarin)             | 30964-13-7 | C25H24O12              | [M-H] <sup>-</sup>     | 6.43E+06 |
| 1-O-Feruloylquinic acid*                          | -          | C17H20O9               | [M+H] <sup>+</sup>     | 6.36E+06 |
| Androsin                                          | 531-28-2   | C15H20O8               | [M-H] <sup>-</sup>     | 6.31E+06 |
| 3-O-Feruloylquinic acid                           | 1899-29-2  | C17H20O9               | [M+H] <sup>+</sup>     | 5.99E+06 |
| 3,4-O-Dicaffeoylquinic Acid Methyl Ester*         | -          | C26H26O12              | [M+H] <sup>+</sup>     | 5.54E+06 |
| Isochlorogenic acid A*                            | 2450-53-5  | C25H24O12              | [M-H] <sup>-</sup>     | 5.41E+06 |

|                                                       |             |           |        |          |
|-------------------------------------------------------|-------------|-----------|--------|----------|
| Trihydroxycinnamoylquinic acid                        | -           | C16H20O10 | [M-H]- | 5.20E+06 |
| 1-O-Feruloyl-D-Glucose                                | -           | C16H20O9  | [M-H]- | 5.10E+06 |
| 3,4,5-Trimethoxyphenyl-1-O-Glucoside                  | -           | C15H22O8  | [M-H]- | 5.07E+06 |
| Vanilloside                                           | 74950-96-2  | C14H20O8  | [M-H]- | 5.01E+06 |
| 3,5-O-Dicaffeoylquinic Acid Methyl Ester*             | 159934-13-1 | C26H26O12 | [M+H]+ | 5.00E+06 |
| 4-Hydroxybenzaldehyde*                                | 123-08-0    | C7H6O2    | [M-H]- | 4.44E+06 |
| 2,6-Dimethoxybenzaldehyde                             | 3392-97-0   | C9H10O3   | [M-H]- | 4.39E+06 |
| p-Coumaric acid-4-O-glucoside*                        | 117405-48-8 | C15H18O8  | [M-H]- | 4.36E+06 |
| 1-O-[(E)-Caffeoyl]-D-glucose                          | -           | C15H18O9  | [M-H]- | 4.16E+06 |
| 2-(Formylamino)benzoic acid                           | 3342-77-6   | C8H7NO3   | [M-H]- | 4.14E+06 |
| Eudesmic acid (3,4,5-trimethoxybenzoic acid)          | 118-41-2    | C10H12O5  | [M+H]+ | 4.11E+06 |
| Methyl 2,4-dihydroxyphenylacetate                     | 67828-42-6  | C9H10O4   | [M-H]- | 4.09E+06 |
| Protocatechuic acid-4-O-glucoside                     | -           | C13H16O9  | [M-H]- | 3.96E+06 |
| 5-(2-Hydroxyethyl)-2-O-glucosylphenol                 | -           | C14H20O8  | [M-H]- | 3.87E+06 |
| 2-Hydroxycinnamic acid                                | 583-17-5    | C9H8O3    | [M-H]- | 3.75E+06 |
| (E)-Ethyl p-methoxycinnamate                          | 24393-56-4  | C12H14O3  | [M+H]+ | 3.73E+06 |
| Feruloylmalic acid                                    | -           | C14H14O8  | [M-H]- | 3.63E+06 |
| Syringin                                              | 118-34-3    | C17H24O9  | [M-H]- | 3.03E+06 |
| Cichoriin                                             | 531-58-8    | C15H16O9  | [M-H]- | 2.95E+06 |
| Sinapinaldehyde                                       | 4206-58-0   | C11H12O4  | [M-H]- | 2.62E+06 |
| Syringic acid                                         | 530-57-4    | C9H10O5   | [M-H]- | 2.61E+06 |
| Isochlorogenic acid B*                                | 14534-61-3  | C25H24O12 | [M-H]- | 2.50E+06 |
| Sinapoylgucuronic acid                                | -           | C17H20O11 | [M-H]- | 2.17E+06 |
| 2,4,6-trihydroxy-acetophenone-6-O-b-D-glucopyranoside | -           | C14H18O9  | [M-H]- | 2.06E+06 |
| Syringoylcaffeoylquinic acid-D-glucose                | -           | C31H36O18 | [M-H]- | 1.98E+06 |
| 5-O-Caffeoylshikimic acid                             | 180981-12-8 | C16H16O8  | [M-H]- | 1.92E+06 |
| Sinapyl alcohol                                       | 537-33-7    | C11H14O4  | [M-H]- | 1.92E+06 |
| Koaburaside                                           | 41653-73-0  | C14H20O9  | [M-H]- | 1.92E+06 |
| Caffeic acid                                          | 331-39-5    | C9H8O4    | [M-H]- | 1.91E+06 |
| Coniferyl alcohol-4-O-glucoside (Coniferin)           | 531-29-3    | C16H22O8  | [M-H]- | 1.91E+06 |
| 4-Hydroxybenzoic acid                                 | 99-96-7     | C7H6O3    | [M-H]- | 1.90E+06 |
| Neochlorogenic acid (5-O-Caffeoylquinic acid)*        | 906-33-2    | C16H18O9  | [M-H]- | 1.90E+06 |
| p-Coumaric acid                                       | 501-98-4    | C9H8O3    | [M+H]+ | 1.89E+06 |
| Isoferulic Acid*                                      | 537-73-5    | C10H10O4  | [M-H]- | 1.72E+06 |
| Ferulic acid*                                         | 537-98-4    | C10H10O4  | [M-H]- | 1.71E+06 |
| Methyl-3-(3-hydroxy-4-methoxyphenyl)propanoate        | 129150-61-4 | C11H14O4  | [M-H]- | 1.71E+06 |
| 4-O-Glucosyl-4-hydroxybenzoic acid                    | -           | C13H16O8  | [M-H]- | 1.67E+06 |
| 3-O-p-Coumaroylquinic acid*                           | 87099-71-6  | C16H18O8  | [M-H]- | 1.64E+06 |
| Syringaldehyde; 4-Hydroxy-3,5-Dimethoxybenzaldehyde   | 134-96-3    | C9H10O4   | [M-H]- | 1.59E+06 |
| Dimethyl Phthalate                                    | 131-11-3    | C10H10O4  | [M-H]- | 1.53E+06 |
| Brevifolin carboxylic acid                            | 18490-95-4  | C13H8O8   | [M-H]- | 1.50E+06 |
| 3-Hydroxy-4-isopropylbenzylalcohol-3-O-glucoside      | -           | C16H24O7  | [M-H]- | 1.48E+06 |

|                                                                                      |             |           |        |          |
|--------------------------------------------------------------------------------------|-------------|-----------|--------|----------|
| 1-O-Sinapoyl-D-glucose*                                                              | -           | C17H22O10 | [M-H]- | 1.47E+06 |
| Benzoic acid                                                                         | 65-85-0     | C7H6O2    | [M+H]+ | 1.46E+06 |
| Glucosyringic Acid                                                                   | -           | C15H20O10 | [M-H]- | 1.43E+06 |
| 3,5-Dicaffeoylquinic acid                                                            | -           | C25H24O12 | [M-H]- | 1.22E+06 |
| 1-O-Gentisoyl-D-glucoside                                                            | 23445-11-6  | C13H16O9  | [M-H]- | 1.21E+06 |
| Vanillin acetate                                                                     | 881-68-5    | C10H10O4  | [M+H]+ | 1.17E+06 |
| 1-Caffeoylquinic acid                                                                | 1241-87-8   | C16H18O9  | [M-H]- | 1.11E+06 |
| 2,4-Dihydroxybenzoic acid*                                                           | 89-86-1     | C7H6O4    | [M-H]- | 1.06E+06 |
| p-Hydroxyphenyl acetic acid                                                          | 156-38-7    | C8H8O3    | [M-H]- | 9.94E+05 |
| Homogentisic acid                                                                    | 451-13-8    | C8H8O4    | [M-H]- | 9.55E+05 |
| Coniferaldehyde                                                                      | 20649-42-7  | C10H10O3  | [M+H]+ | 9.35E+05 |
| 3,4-Dihydroxybenzeneacetic acid                                                      | 102-32-9    | C8H8O4    | [M-H]- | 9.09E+05 |
| Caffeic aldehyde                                                                     | 141632-15-7 | C9H8O3    | [M+H]+ | 8.94E+05 |
| 3,4,5-Tricaffeoylquinic acid                                                         | 86632-03-3  | C34H30O15 | [M-H]- | 7.93E+05 |
| Benzyl-(2"-O-xylosyl)glucoside                                                       | -           | C18H26O10 | [M-H]- | 7.53E+05 |
| Trans-5-O-(p-Coumaroyl)shikimate                                                     | -           | C16H16O7  | [M+H]+ | 6.79E+05 |
| Methyl ferulate                                                                      | 2309-07-1   | C11H12O4  | [M+H]+ | 6.62E+05 |
| p-Coumaryl alcohol                                                                   | 3690-05-9   | C9H10O2   | [M-H]- | 6.24E+05 |
| 2,6-Dimethoxybenzoic acid                                                            | 1466-76-8   | C9H10O4   | [M-H]- | 6.18E+05 |
| Ethyl caffeate                                                                       | 102-37-4    | C11H12O4  | [M-H]- | 6.03E+05 |
| 4-Hydroxyacetophenone                                                                | 99-93-4     | C8H8O2    | [M-H]- | 5.93E+05 |
| 1-O-p-Hydroxycinnamoyl-3-O-caffeoylglycerol                                          | -           | C21H20O8  | [M+H]+ | 5.83E+05 |
| Sinapaldehyde-4-O-Glucoside                                                          | 154461-65-1 | C17H22O9  | [M+H]+ | 5.70E+05 |
| Tyrosol                                                                              | 501-94-0    | C8H10O2   | [M-H]- | 5.66E+05 |
| 5'-Glucosyloxyjasmanic acid                                                          | -           | C18H28O9  | [M-H]- | 5.64E+05 |
| 1,6-Di-O-caffeoyl-β-D-glucose                                                        | -           | C24H24O12 | [M-H]- | 4.87E+05 |
| 1-O-Vanilloyl-D-Glucose*                                                             | -           | C14H18O9  | [M-H]- | 4.53E+05 |
| Phthalic acid                                                                        | 88-99-3     | C8H6O4    | [M-H]- | 4.49E+05 |
| 2,4-Dinitrophenol                                                                    | 51-28-5     | C6H4N2O5  | [M-H]- | 4.36E+05 |
| Cinnamic acid                                                                        | 140-10-3    | C9H8O2    | [M-H]- | 4.31E+05 |
| 4-Dihydroxyphenethoxy-8-O-β-D-[6-O-(4-O-β-D-glucopyranosyl)-feruloyl]glucopyranoside | -           | C30H38O15 | [M-H]- | 4.21E+05 |
| 4-Hydroxy-3-methoxymandelate                                                         | 55-10-7     | C9H10O5   | [M-H]- | 4.01E+05 |
| Phenethyl caffeate                                                                   | 104594-70-9 | C17H16O4  | [M-H]- | 3.99E+05 |
| Sinapoyl-4-O-glucoside*                                                              | -           | C17H22O10 | [M-H]- | 3.84E+05 |
| Mudanoside A                                                                         | -           | C14H18O9  | [M+H]+ | 3.65E+05 |
| Mandelic acid-β-glucoside                                                            | -           | C14H18O8  | [M-H]- | 3.60E+05 |
| Hydroxyphenyllactic acid                                                             | 306-23-0    | C9H10O4   | [M-H]- | 3.31E+05 |
| Sinapic acid                                                                         | 530-59-6    | C11H12O5  | [M-H]- | 3.11E+05 |
| 4-O-(6'-O-Glucosylcaffeoyl)-4-hydroxybenzoic acid                                    | -           | C22H22O11 | [M-H]- | 3.05E+05 |
| Ginkgolic Acid C13:2                                                                 | -           | C20H28O3  | [M+H]+ | 2.92E+05 |
| Dihydroferulic Acid                                                                  | 1135-23-5   | C10H12O4  | [M-H]- | 2.77E+05 |
| 3,6-Di-O-caffeoyl glucose                                                            | -           | C24H24O12 | [M-H]- | 2.74E+05 |

|                                                                                         |             |            |        |          |
|-----------------------------------------------------------------------------------------|-------------|------------|--------|----------|
| Methyl salicylate-2-O-glucoside                                                         | 10019-60-0  | C14H18O8   | [M-H]- | 2.73E+05 |
| Dihydrocaffeoylglucose                                                                  | -           | C15H20O9   | [M-H]- | 2.61E+05 |
| p-Coumaric acid methyl ester                                                            | 3943-97-3   | C10H10O3   | [M+H]+ | 2.56E+05 |
| 3,4,5-Trimethoxycinnamic acid                                                           | 90-50-6     | C12H14O5   | [M-H]- | 2.55E+05 |
| 1-O-Eudesmoylquinic acid*                                                               | -           | C17H22O10  | [M-H]- | 2.45E+05 |
| p-Coumaroylmalic acid                                                                   | -           | C13H12O7   | [M-H]- | 2.23E+05 |
| Feruloyl syringic acid                                                                  | -           | C19H18O8   | [M+H]+ | 2.13E+05 |
| 1-O-Glucosyl sinapate                                                                   | 78185-48-5  | C17H22O10  | [M-H]- | 2.11E+05 |
| 1-O-(3,4-Dihydroxy-5-methoxy-<br>benzoyl)-glucoside                                     | -           | C14H18O10  | [M-H]- | 2.09E+05 |
| 6'-O-Feruloyl-D-sucrose                                                                 | 118230-77-6 | C22H30O14  | [M-H]- | 2.00E+05 |
| 5-O-p-Coumaroylquinic acid                                                              | 1899-30-5   | C16H18O8   | [M-H]- | 1.99E+05 |
| Anthranilate-1-O-Sophoroside                                                            | -           | C19H27NO12 | [M-H]- | 1.97E+05 |
| 3-Hydroxy-5-Methylphenol-1-O-<br>Glucoside                                              | -           | C13H18O7   | [M-H]- | 1.91E+05 |
| 4-Hydroxyphenethoxy-8-O-β-D-[6-O-(4-O-β-D-<br>glucopyranosyl)-sinapoyl] glucopyranoside | -           | C31H40O16  | [M-H]- | 1.90E+05 |
| 3,4'-Dihydroxy-3',5'-<br>dimethoxypropiofenone                                          | 136196-47-9 | C11H14O5   | [M+H]+ | 1.87E+05 |
| 4-O-Glucosyl-3,4-<br>dihydroxybenzyl alcohol                                            | -           | C13H18O8   | [M-H]- | 1.87E+05 |
| 4-Methoxycinnamaldehyde                                                                 | 1963-36-6   | C10H10O2   | [M+H]+ | 1.85E+05 |
| 3,4-Dimethoxycinnamic acid                                                              | 14737-89-4  | C11H12O4   | [M-H]- | 1.77E+05 |
| Di-O-Glucosylquinic acid                                                                | -           | C19H32O16  | [M-H]- | 1.76E+05 |
| 5-Glucosyloxy-2-Hydroxybenzoic acid methyl ester                                        | -           | C14H18O9   | [M-H]- | 1.56E+05 |
| 3-Aminosalicylic acid*                                                                  | 570-23-0    | C7H7NO3    | [M-H]- | 1.53E+05 |
| Ethyl ferulate                                                                          | 4046-02-0   | C12H14O4   | [M-H]- | 1.52E+05 |
| 3,4'-Dihydroxy-3'-methoxybenzenepentanoic acid                                          | -           | C12H16O5   | [M-H]- | 1.51E+05 |
| Salicin                                                                                 | 138-52-3    | C13H18O7   | [M-H]- | 1.49E+05 |
| Rosmarinic acid                                                                         | 537-15-5    | C18H16O8   | [M-H]- | 1.40E+05 |
| Syringaldehyde-4-O-glucoside                                                            | -           | C15H20O9   | [M-H]- | 1.17E+05 |
| 4-p-Cumaroyl-rhamnosyl-(1→6)-D-<br>glucose                                              | -           | C21H28O12  | [M-H]- | 1.09E+05 |
| Chlorogenic acid methyl ester                                                           | 29708-87-0  | C17H20O9   | [M-H]- | 1.07E+05 |
| β-Oxoacteoside                                                                          | -           | C29H34O16  | [M-H]- | 1.07E+05 |
| 2-Amino-3-methoxybenzoic acid                                                           | 3177-80-8   | C8H9NO3    | [M+H]+ | 1.04E+05 |
| Benzyl glucoside                                                                        | 4304-12-5   | C13H18O6   | [M-H]- | 1.04E+05 |
| Vanillic acid-4-O-glucoside*                                                            | 32142-31-7  | C14H18O9   | [M-H]- | 1.00E+05 |
| 3-O-p-Coumaroylshikimic acid                                                            | -           | C16H16O7   | [M-H]- | 9.67E+04 |
| 6-O-Caffeoylarbutin                                                                     | 136172-60-6 | C21H22O10  | [M-H]- | 9.54E+04 |
| Methyl caffeate                                                                         | 3843-74-1   | C10H10O4   | [M-H]- | 8.01E+04 |
| 3,4-Dimethoxyphenyl acetic acid                                                         | 93-40-3     | C10H12O4   | [M-H]- | 7.62E+04 |
| 1-O-p-Coumaroylquinic acid*                                                             | -           | C16H18O8   | [M-H]- | 7.07E+04 |
| Homovanilloylquinic acid                                                                | -           | C16H20O9   | [M-H]- | 6.99E+04 |

|                                                 |             |           |        |          |
|-------------------------------------------------|-------------|-----------|--------|----------|
| 2,6-Di-tert-butylphenol                         | 128-39-2    | C14H22O   | [M-H]- | 6.46E+04 |
| 4-Aminobenzoic acid                             | 150-13-0    | C7H7NO2   | [M+H]+ | 6.17E+04 |
| Maleoyl-caffeoylquinic acid                     | -           | C20H20O12 | [M-H]- | 6.13E+04 |
| Isoeugenol                                      | 97-54-1     | C10H12O2  | [M+H]+ | 5.74E+04 |
| 4-Methoxycinnamic acid                          | 830-09-1    | C10H10O3  | [M-H]- | 5.40E+04 |
| Plantamajoside                                  | 104777-68-6 | C29H36O16 | [M-H]- | 5.07E+04 |
| Veratric acid                                   | 93-07-2     | C9H10O4   | [M-H]- | 4.77E+04 |
| Propylparaben                                   | 94-13-3     | C10H12O3  | [M-H]- | 4.38E+04 |
| p-Coumaraldehyde                                | 2538-87-6   | C9H8O2    | [M-H]- | 4.33E+04 |
| Trigallic acid                                  | 2131-66-0   | C21H14O13 | [M-H]- | 4.19E+04 |
| Stilbostemin B                                  | 162411-67-8 | C15H16O2  | [M+H]+ | 4.12E+04 |
| O-Anisic acid (2-Methoxybenzoic acid)           | 529-75-9    | C8H8O3    | [M-H]- | 3.66E+04 |
| Picein (4-Acetylphenyl-glucoside)               | 530-14-3    | C14H18O7  | [M-H]- | 3.17E+04 |
| 2-O-Salicyl-6-O-Galloyl-D-Glucose               | -           | C20H20O12 | [M-H]- | 3.15E+04 |
| 4-Aminosalicylic acid*                          | 65-49-6     | C7H7NO3   | [M-H]- | 3.07E+04 |
| Hydrocinnamic acid                              | 501-52-0    | C9H10O2   | [M-H]- | 3.06E+04 |
| Ginkgolic Acid C15:1                            | 22910-60-7  | C22H34O3  | [M+H]+ | 3.03E+04 |
| 4-O-(6'-O-Glucosylcaffeoylglucosyl)-            |             |           |        |          |
| 4-hydroxybenzyl alcohol                         | -           | C28H34O15 | [M-H]- | 3.00E+04 |
| Coniferyl ferulate                              | 63644-62-2  | C20H20O6  | [M-H]- | 2.84E+04 |
| 5-O-p-Coumaroylshikimic acid O-glucoside        | -           | C22H26O12 | [M-H]- | 2.44E+04 |
| Homovanillic acid; 4-Hydroxy-3-                 |             |           |        |          |
| methoxyphenylacetic acid                        | 306-08-1    | C9H10O4   | [M-H]- | 2.43E+04 |
| Disinapoyl glucoside                            | -           | C28H32O14 | [M-H]- | 2.27E+04 |
| Methyleugenol                                   | 93-15-2     | C11H14O2  | [M+H]+ | 2.26E+04 |
| Tetragallic Acid(3"-O-galloyl-4"-O-galloyl-4-O- |             |           |        |          |
| galloyl-galloyl acid)                           | -           | C28H18O17 | [M-H]- | 2.17E+04 |
| 3-methoxy-5-hydroxy-1-O-β-D-                    |             |           |        |          |
| glucopyranoside                                 | -           | C13H18O8  | [M-H]- | 2.17E+04 |
| Sinapoyl malate                                 | 92344-58-6  | C15H16O9  | [M+H]+ | 2.14E+04 |
| Methyl Anthranilate                             | 134-20-3    | C8H9NO2   | [M+H]+ | 2.10E+04 |
| 3,4-Dihydroxybenzoic Acid Ethyl Ester           |             |           |        |          |
| (Protocatechuic acid ethyl ester)               | 3943-89-3   | C9H10O4   | [M-H]- | 1.92E+04 |
| p-Coumaroylcinnamoyltartaric acid               | -           | C22H18O9  | [M-H]- | 1.70E+04 |
| Bis(p-Coumaroyl)malic acid                      | -           | C22H18O9  | [M-H]- | 1.70E+04 |
| Methyl2-O-(4-hydroxybenzoyl)-2,4,6-             |             |           |        |          |
| trihydroxyphenylacetate                         | -           | C16H14O7  | [M-H]- | 1.50E+04 |
| 3,4,5-Tri-O-Galloylshikimic acid                | -           | C28H22O17 | [M-H]- | 1.34E+04 |
| <b>Flavonoids</b>                               |             |           |        |          |
| Luteolin-7-O-neohesperidoside (Lonicerin)*      | 25694-72-8  | C27H30O15 | [M+H]+ | 2.80E+07 |
| Chrysoeriol-7-O-rutinoside                      | -           | C28H32O15 | [M-H]- | 2.62E+07 |
| Luteolin-6-C-rhamnoside-7-O-glucoside           | -           | C27H30O15 | [M+H]+ | 2.58E+07 |
| 4'-Hydroxy-5,7-dimethoxyflavanone               | -           | C17H16O5  | [M-H]- | 2.28E+07 |
| Kaempferol-3-O-robinobioside(Biorobin)          | 17297-56-2  | C27H30O15 | [M-H]- | 2.21E+07 |

|                                                 |            |            |                    |          |
|-------------------------------------------------|------------|------------|--------------------|----------|
| Genistein-7-O-galactoside-rhamnose              | -          | C27H30O14  | [M+H] <sup>+</sup> | 1.88E+07 |
| Diosmetin-7-O-rutinoside (Diosmin)*             | 520-27-4   | C28H32O15  | [M+H] <sup>+</sup> | 1.87E+07 |
| Apigenin-7-O-(6"-p-Coumaryl)glucoside           | -          | C30H26O12  | [M+H] <sup>+</sup> | 1.84E+07 |
| Apigenin-7-O-rutinoside (Isorhoifolin)          | 552-57-8   | C27H30O14  | [M+H] <sup>+</sup> | 1.47E+07 |
| Luteolin-7-O-glucoside (Cynaroside)*            | 5373-11-5  | C21H20O11  | [M+H] <sup>+</sup> | 1.26E+07 |
| Hesperetin-7-O-rutinoside (Hesperidin)          | 520-26-3   | C28H34O15  | [M-H] <sup>-</sup> | 9.70E+06 |
| Hesperetin-7-O-neohesperidoside(Neohesperidin)  | 13241-33-3 | C28H34O15  | [M-H] <sup>-</sup> | 9.56E+06 |
| Hispidulin-7-O-Glucoside                        | 17680-84-1 | C22H22O11  | [M+H] <sup>+</sup> | 8.88E+06 |
| Chrysoeriol                                     | 491-71-4   | C16H12O6   | [M+H] <sup>+</sup> | 7.59E+06 |
| Pratensein                                      | 2284-31-3  | C16H12O6   | [M+H] <sup>+</sup> | 7.50E+06 |
| Rhamnocitrin (7-Methylkaempferol)               | 569-92-6   | C16H12O6   | [M+H] <sup>+</sup> | 7.44E+06 |
| Hispidulin (5,7,4'-Trihydroxy-6-methoxyflavone) | 1447-88-7  | C16H12O6   | [M+H] <sup>+</sup> | 7.24E+06 |
| 6,7,8-Tetrahydroxy-5-methoxyflavone             | -          | C16H12O6   | [M+H] <sup>+</sup> | 7.00E+06 |
| 5,7,2'-Trihydroxy-8-methoxyflavone              | -          | C16H12O6   | [M-H] <sup>-</sup> | 6.99E+06 |
| Diosmetin (5,7,3'-Trihydroxy-4'-methoxyflavone) | 520-34-3   | C16H12O6   | [M-H] <sup>-</sup> | 6.89E+06 |
| Eriodictyol-7-O-Rutinoside (Eriocitrin)         | 13463-28-0 | C27H32O15  | [M-H] <sup>-</sup> | 5.35E+06 |
| Kaempferol 3-neohesperidoside                   | 32602-81-6 | C27H30O15  | [M+H] <sup>+</sup> | 4.74E+06 |
| 3,4'-Dihydroxyflavone                           | 14919-49-4 | C15H10O4   | [M+H] <sup>+</sup> | 4.56E+06 |
| Isorhamnetin-7-O-glucoside (Brassicin)*         | 6743-96-0  | C22H22O12  | [M+H] <sup>+</sup> | 4.45E+06 |
| Isorhamnetin-3-O-Glucoside*                     | 5041-82-7  | C22H22O12  | [M+H] <sup>+</sup> | 4.35E+06 |
| Rhamnetin-3-O-Glucoside*                        | 27875-34-9 | C22H22O12  | [M+H] <sup>+</sup> | 4.25E+06 |
| Kaempferol-3-O-rutinoside(Nicotiflorin)         | 17650-84-9 | C27H30O15  | [M-H] <sup>-</sup> | 4.15E+06 |
| Isoquercitrin*                                  | 21637-25-2 | C21H20O12  | [M+H] <sup>+</sup> | 4.09E+06 |
| 6-Hydroxykaempferol-7-O-glucoside               | -          | C21H20O12  | [M+H] <sup>+</sup> | 4.02E+06 |
| Quercetin-5-O-β-D-glucoside*                    | -          | C21H20O12  | [M+H] <sup>+</sup> | 3.96E+06 |
| Isohyperoside                                   | 35589-21-0 | C21H20O12  | [M+H] <sup>+</sup> | 3.94E+06 |
| Chrysoeriol-7-O-(6"-malonyl)glucoside           | -          | C25H24O14  | [M+H] <sup>+</sup> | 2.82E+06 |
| Luteolin-3'-O-glucoside*                        | 5154-41-6  | C21H20O11  | [M+H] <sup>+</sup> | 2.60E+06 |
| Kaempferol-3-O-glucoside (Astragalin)*          | 480-10-4   | C21H20O11  | [M+H] <sup>+</sup> | 2.56E+06 |
| Hispidulin-8-C-(2"-O-xylosyl)glucoside          | -          | C27H30O15  | [M+H] <sup>+</sup> | 2.27E+06 |
| Luteolin-4'-O-glucoside*                        | 6920-38-3  | C21H20O11  | [M+H] <sup>+</sup> | 2.10E+06 |
| Peonidin-3-O-sambubioside                       | -          | C27H31O15+ | [M] <sup>+</sup>   | 2.01E+06 |
| Diosmetin-7-O-Neohesperidoside (Neodiosmin)*    | 38665-01-9 | C28H32O15  | [M+H] <sup>+</sup> | 1.98E+06 |
| Kaempferol-3-O-(6"-acetyl)glucoside             | -          | C23H22O12  | [M-H] <sup>-</sup> | 1.94E+06 |
| Kaempferol-4'-O-glucoside*                      | -          | C21H20O11  | [M+H] <sup>+</sup> | 1.93E+06 |
| 6-C-MethylKaempferol-3-glucoside                | -          | C22H22O11  | [M+H] <sup>+</sup> | 1.88E+06 |
| Hispidulin-7-O-(6"-O-p-Coumaroyl)Glucoside      | -          | C31H28O13  | [M+H] <sup>+</sup> | 1.80E+06 |
| Luteolin (5,7,3',4'-Tetrahydroxyflavone)*       | 491-70-3   | C15H10O6   | [M-H] <sup>-</sup> | 1.66E+06 |
| Diosmetin-7-O-galactoside                       | -          | C22H22O11  | [M+H] <sup>+</sup> | 1.50E+06 |
| Kaempferol-3-O-(6"-malonyl)glucoside            | -          | C24H22O14  | [M+H] <sup>+</sup> | 1.32E+06 |
| Quercetin-3-O-galactoside (Hyperin)*            | 482-36-0   | C21H20O12  | [M-H] <sup>-</sup> | 1.28E+06 |
| Apigenin-6,8-di-C-glucoside (Vicenin-2)         | 23666-13-9 | C27H30O15  | [M+H] <sup>+</sup> | 1.07E+06 |
| Quercetin-4'-O-glucoside (Spiraeoside)*         | 20229-56-5 | C21H20O12  | [M-H] <sup>-</sup> | 1.05E+06 |
| Eriodictyol (5,7,3',4'-Tetrahydroxyflavanone)   | 552-58-9   | C15H12O6   | [M-H] <sup>-</sup> | 1.03E+06 |



|                                             |            |            |        |          |
|---------------------------------------------|------------|------------|--------|----------|
| Naringenin-7-O-Rutinoside(Narirutin)*       | 14259-46-2 | C27H32O14  | [M-H]- | 9.63E+05 |
| Gallocatechin-(4 $\alpha$ →8)-catechin      | -          | C30H26O13  | [M-H]- | 9.53E+05 |
| 6"-O-Malonylgenistin                        | 51011-05-3 | C24H22O13  | [M+H]+ | 9.31E+05 |
| Tamarixetin-3-O-(6"-malonyl)glucoside       | -          | C25H24O15  | [M+H]+ | 9.18E+05 |
| Quercetin-3-O-glucoside (Isoquercitrin)*    | 482-35-9   | C21H20O12  | [M-H]- | 8.52E+05 |
| Isorhamnetin-3-O-(6"-malonylglucoside)      | -          | C25H24O15  | [M+H]+ | 8.48E+05 |
| Dihydromyricetin (Ampelopsin)               | 27200-12-0 | C15H12O8   | [M-H]- | 8.18E+05 |
| Quercetin-7-O-glucoside*                    | 491-50-9   | C21H20O12  | [M-H]- | 7.94E+05 |
| Genistein-7-O-galactoside*                  | -          | C21H20O10  | [M+H]+ | 7.73E+05 |
| Peonidin-3-O-(6"-O-p-coumaroyl)glucoside    | -          | C31H29O13+ | [M]+   | 7.67E+05 |
| Luteolin-7-O-(6"-malonyl)glucoside          | -          | C24H22O14  | [M+H]+ | 7.27E+05 |
| Rehderianin I                               | 90965-30-3 | C17H14O7   | [M+H]+ | 6.84E+05 |
| Kaempferol-3-O-galactoside (Trifolin)*      | 23627-87-4 | C21H20O11  | [M-H]- | 6.76E+05 |
| Dihydroquercetin(Taxifolin)                 | 480-18-2   | C15H12O7   | [M-H]- | 6.68E+05 |
| 4',5,7-Trihydroxy-3',6-dimethoxyflavone     | 18085-97-7 | C17H14O7   | [M+H]+ | 6.59E+05 |
| 3-O-Acetylpinobanksin                       | 52117-69-8 | C17H14O6   | [M-H]- | 6.35E+05 |
| Myricetin-3,7,3'-trimethyl ether            | -          | C18H16O8   | [M-H]- | 6.17E+05 |
| Naringenin-7-O-Neohesperidoside(Naringin)*  | 10236-47-2 | C27H32O14  | [M-H]- | 6.17E+05 |
| Kaempferol-7-O-glucoside*                   | 16290-07-6 | C21H20O11  | [M-H]- | 5.74E+05 |
| Cajanin                                     | 32884-36-9 | C16H12O6   | [M+H]+ | 5.57E+05 |
| Hesperetin                                  | 520-33-2   | C16H14O6   | [M-H]- | 5.55E+05 |
| Hesperetin-7-O-glucoside                    | 31712-49-9 | C22H24O11  | [M+H]+ | 5.36E+05 |
| Isoscutellarein                             | 41440-05-5 | C15H10O6   | [M+H]+ | 5.33E+05 |
| 2'-Hydroxygenistein                         | 1156-78-1  | C15H10O6   | [M+H]+ | 5.32E+05 |
| Pinobanksin                                 | 548-82-3   | C15H12O5   | [M-H]- | 5.31E+05 |
| Dihydrokaempferol-7-O-glucoside             | -          | C21H22O11  | [M-H]- | 5.30E+05 |
| Isovitexin-7-O-(6"-feruloyl)glucoside       | -          | C37H38O18  | [M+H]+ | 5.16E+05 |
| Naringenin (5,7,4'-Trihydroxyflavanone)*    | 480-41-1   | C15H12O5   | [M-H]- | 5.06E+05 |
| Luteolin-7-O-rutinoside*                    | 3563-98-2  | C27H30O15  | [M+H]+ | 4.36E+05 |
| Luteolin-7-O-glucuronide                    | 29741-10-4 | C21H18O12  | [M+H]+ | 4.24E+05 |
| Genistein                                   | 446-72-0   | C15H10O5   | [M+H]+ | 4.02E+05 |
| Rhamnetin-3-O-Rutinoside                    | -          | C28H32O16  | [M+H]+ | 4.01E+05 |
| 2,4,2',4'-tetrahydroxy-3'-prenylchalcone    | -          | C20H20O5   | [M+H]+ | 3.96E+05 |
| Scutellarein-7-O-glucuronide (Scutellarin)  | 27740-01-8 | C21H18O12  | [M+H]+ | 3.74E+05 |
| Isorhamnetin-3-O-neohesperidoside           | 55033-90-4 | C28H32O16  | [M+H]+ | 3.74E+05 |
| Tangeretin (4',5,6,7,8-Pentamethoxyflavone) | 481-53-8   | C20H20O7   | [M+H]+ | 3.52E+05 |
| Naringenin-7-O-(6"-malonyl)glucoside        | -          | C24H24O13  | [M+H]+ | 3.49E+05 |
| 6-C-Methylquercetin-3-O-rutinoside          | -          | C28H32O16  | [M+H]+ | 3.45E+05 |
| Naringenin chalcone*                        | 73692-50-9 | C15H12O5   | [M+H]+ | 3.44E+05 |
| Chrysoeriol-7-O-rutinoside-5-O-glucoside    | -          | C34H42O20  | [M+H]+ | 3.41E+05 |
| Peonidin                                    | 134-01-0   | C16H13O6+  | [M]+   | 3.37E+05 |
| 7,8-Dihydroxy-5,6,4'-trimethoxyflavone      | -          | C18H16O7   | [M+H]+ | 3.33E+05 |
| Genistein-8-C-glucoside                     | 66026-80-0 | C21H20O10  | [M+H]+ | 3.22E+05 |
| Nepetin (5,7,3',4'-Tetrahydroxy-6-          | 520-11-6   | C16H12O7   | [M+H]+ | 3.22E+05 |

|                                                     |             |            |                    |          |
|-----------------------------------------------------|-------------|------------|--------------------|----------|
| methoxyflavone)                                     |             |            |                    |          |
| Eupatilin (5,7-Dihydroxy-3',4',6-Trimethoxyflavone) | 22368-21-4  | C18H16O7   | [M+H] <sup>+</sup> | 3.20E+05 |
| Isoluteolin (5,7,3',4'-tetrahydroxyisoflavone)*     | 480-23-9    | C15H10O6   | [M+H] <sup>+</sup> | 3.18E+05 |
| Naringenin-7-O-glucoside (Prunin)*                  | 529-55-5    | C21H22O10  | [M-H] <sup>-</sup> | 3.11E+05 |
| Butin                                               | 492-14-8    | C15H12O5   | [M+H] <sup>+</sup> | 3.08E+05 |
| Epigallocatechin-3-gallate*                         | 989-51-5    | C22H18O11  | [M-H] <sup>-</sup> | 2.95E+05 |
| Kaempferol-3-O-rutinoside-7-O-glucoside             | -           | C33H40O20  | [M+H] <sup>+</sup> | 2.93E+05 |
| Hesperetin-7-O-(6"-malonyl)glucoside                | -           | C25H26O14  | [M-H] <sup>-</sup> | 2.86E+05 |
| Nobiletin (5,6,7,8,3',4'-Hexamethoxyflavone)        | 478-01-3    | C21H22O8   | [M+H] <sup>+</sup> | 2.84E+05 |
| Apigenin-6-C-glucoside (Isovitexin)*                | 29702-25-8  | C21H20O10  | [M-H] <sup>-</sup> | 2.70E+05 |
| Isorhamnetin-3-O-(6"-acetyl)glucoside)              | -           | C24H24O13  | [M-H] <sup>-</sup> | 2.69E+05 |
| Eurycarpin A                                        | 166547-20-2 | C20H18O5   | [M+H] <sup>+</sup> | 2.68E+05 |
| Quercetin-3-O-sophoroside (Baimaside)               | 18609-17-1  | C27H30O17  | [M+H] <sup>+</sup> | 2.63E+05 |
| Eupatorin (5,3'-Dihydroxy-6,7,4'-trimethoxyflavone) | 855-96-9    | C18H16O7   | [M+H] <sup>+</sup> | 2.61E+05 |
| Luteolin-8-C-glucoside (Orientin)*                  | 28608-75-5  | C21H20O11  | [M+H] <sup>+</sup> | 2.58E+05 |
| Isovitexin                                          | 38953-85-4  | C21H20O10  | [M+H] <sup>+</sup> | 2.54E+05 |
| Kaempferol-3-O-(6"-Rhamnosyl-2"-                    |             |            |                    |          |
| Glucosyl)Glucoside (Camelliaside A)                 | 135095-52-2 | C33H40O20  | [M+H] <sup>+</sup> | 2.50E+05 |
| Quercetin-7-O-rutinoside*                           | 147714-62-3 | C27H30O16  | [M+H] <sup>+</sup> | 2.42E+05 |
| Cyanidin-3-O-sambubioside [Cyanidin-3-O-(2"-O-      |             |            |                    |          |
| xylosyl)glucoside]                                  | 63535-17-1  | C26H29O15+ | [M] <sup>+</sup>   | 2.42E+05 |
| Homoeriodictyol                                     | 446-71-9    | C16H14O6   | [M+H] <sup>+</sup> | 2.41E+05 |
| Chrysoeriol-5-O-glucoside*                          | -           | C22H22O11  | [M-H] <sup>-</sup> | 2.40E+05 |
| Catechin gallate*                                   | 130405-40-2 | C22H18O10  | [M-H] <sup>-</sup> | 2.36E+05 |
| Epicatechin gallate*                                | 1257-08-5   | C22H18O10  | [M-H] <sup>-</sup> | 2.32E+05 |
| Apigenin-8-C-Glucoside (Vitexin)*                   | 3681-93-4   | C21H20O10  | [M-H] <sup>-</sup> | 2.31E+05 |
| Chrysoeriol-8-C-glucoside (Scoparin)                | 301-16-6    | C22H22O11  | [M+H] <sup>+</sup> | 2.29E+05 |
| Kaempferol-3-O-rhamnoside(Kaempferin)               | 482-39-3    | C21H20O10  | [M-H] <sup>-</sup> | 2.26E+05 |
| Quercetin-3-O-neohesperidoside*                     | 117611-67-3 | C27H30O16  | [M+H] <sup>+</sup> | 2.24E+05 |
| Apigenin-6-C-arabinoside-8-C-glucoside              |             |            |                    |          |
| (Isoschaftoside)                                    | 52012-29-0  | C26H28O14  | [M+H] <sup>+</sup> | 2.18E+05 |
| Quercetin-3-O-rhamnoside(Quercitrin)                | 522-12-3    | C21H20O11  | [M+H] <sup>+</sup> | 2.15E+05 |
| Quercetin-3-O-(6"-malonyl)galactoside*              | -           | C24H22O15  | [M-H] <sup>-</sup> | 2.13E+05 |
| Vitexin-2"-O-glucoside                              | 61360-94-9  | C27H30O15  | [M+H] <sup>+</sup> | 2.12E+05 |
| Isobavachalcone D                                   | -           | C19H20O4   | [M+H] <sup>+</sup> | 2.09E+05 |
| Dihydroxy-dimethoxyflavone-7-O-glucoside            | -           | C23H24O11  | [M+H] <sup>+</sup> | 2.04E+05 |
| Catechin*                                           | 154-23-4    | C15H14O6   | [M-H] <sup>-</sup> | 2.01E+05 |
| Quercetin-3-O-rutinoside (Rutin)*                   | 153-18-4    | C27H30O16  | [M-H] <sup>-</sup> | 2.01E+05 |
| Quercetin                                           | 117-39-5    | C15H10O7   | [M+H] <sup>+</sup> | 1.97E+05 |
| Diosmetin-7-O-(6"-malonyl)glucoside                 | -           | C25H24O14  | [M+H] <sup>+</sup> | 1.95E+05 |
| Isovitexin-2"-O-rhamnoside*                         | -           | C27H30O14  | [M+H] <sup>+</sup> | 1.90E+05 |
| Hispidulin-8-C-glucoside                            | -           | C22H22O11  | [M+H] <sup>+</sup> | 1.89E+05 |
| Isomethacin                                         | 74560-05-7  | C16H14O4   | [M+H] <sup>+</sup> | 1.78E+05 |
| Hispidulin-8-C-(2"-O-glucosyl)glucoside             | -           | C28H32O16  | [M+H] <sup>+</sup> | 1.78E+05 |

|                                                |             |           |                    |          |
|------------------------------------------------|-------------|-----------|--------------------|----------|
| Chrysoeriol-6-C-glucoside-4'-O-glucoside       | -           | C28H32O16 | [M+H] <sup>+</sup> | 1.74E+05 |
| 5,7-Dihydroxy-3',4',5'-trimethoxyflavone       | 18103-42-9  | C18H16O7  | [M+H] <sup>+</sup> | 1.69E+05 |
| Chrysoeriol-7-O-glucoside*                     | 19993-32-9  | C22H22O11 | [M-H] <sup>-</sup> | 1.64E+05 |
| Naringenin-7-O-Rutinoside-4'-O-glucoside       | -           | C33H42O19 | [M-H] <sup>-</sup> | 1.64E+05 |
| Pinostrobin Chalcone                           | 18956-15-5  | C16H14O4  | [M+H] <sup>+</sup> | 1.63E+05 |
| Tetrahydroxyflavone-7-O-glucuronide            | -           | C21H18O12 | [M-H] <sup>-</sup> | 1.57E+05 |
| Eriodictyol-7-O-(6"-malonyl)glucoside          | -           | C24H24O14 | [M+H] <sup>+</sup> | 1.54E+05 |
| Taxifolin-3-O-rhamnoside (Astilbin)            | 29838-67-3  | C21H22O11 | [M-H] <sup>-</sup> | 1.50E+05 |
| Genistein-7-O-Glucoside (Genistin)*            | 529-59-9    | C21H20O10 | [M-H] <sup>-</sup> | 1.50E+05 |
| Vitexin-2"-O-rhamnoside*                       | 64820-99-1  | C27H30O14 | [M+H] <sup>+</sup> | 1.48E+05 |
| Aromadendrin-7-O-glucoside                     | 28189-90-4  | C21H22O11 | [M-H] <sup>-</sup> | 1.48E+05 |
| Quercetin-3-O-apiosyl(1→2)galactoside*         | -           | C26H28O16 | [M+H] <sup>+</sup> | 1.48E+05 |
| 5,2'-Dihydroxy-7,8-dimethoxyflavone glycosides | -           | C23H24O11 | [M+H] <sup>+</sup> | 1.42E+05 |
| 8-Methoxykaempferol-7-O-rhamnoside             | -           | C22H22O11 | [M-H] <sup>-</sup> | 1.38E+05 |
| Tamarixetin-3-O-glucoside (Tamarixin)          | 27542-39-8  | C22H22O12 | [M+H] <sup>+</sup> | 1.36E+05 |
| Kaempferol-3-O-glucuronide                     | 22688-78-4  | C21H18O12 | [M-H] <sup>-</sup> | 1.26E+05 |
| Eriodictyol-7-O-glucoside                      | 38965-51-4  | C21H22O11 | [M+H] <sup>+</sup> | 1.23E+05 |
| Isotamarixin                                   | -           | C22H22O12 | [M+H] <sup>+</sup> | 1.18E+05 |
| Chrysin                                        | 480-40-0    | C15H10O4  | [M+H] <sup>+</sup> | 1.17E+05 |
| Galangin (3,5,7-Trihydroxyflavone)             | 548-83-4    | C15H10O5  | [M-H] <sup>-</sup> | 1.13E+05 |
| 6-Hydroxyluteolin 5-glucoside                  | -           | C21H20O12 | [M-H] <sup>-</sup> | 1.06E+05 |
| Quercetin-3-O-sambubioside*                    | 83048-35-5  | C26H28O16 | [M+H] <sup>+</sup> | 1.01E+05 |
| Diosmetin-6-C-glucoside                        | -           | C22H22O11 | [M+H] <sup>+</sup> | 1.00E+05 |
| Quercetin-3-O-robinobioside*                   | 52525-35-6  | C27H30O16 | [M-H] <sup>-</sup> | 9.92E+04 |
| Gallocatechin-(4α→8)-gallocatechin             | -           | C30H26O14 | [M+H] <sup>+</sup> | 9.91E+04 |
| Quercetin-3-O-(2"-acetyl)glucuronide           | -           | C23H20O14 | [M-H] <sup>-</sup> | 9.86E+04 |
| Licoricone*                                    | 51847-92-8  | C22H22O6  | [M+H] <sup>+</sup> | 9.41E+04 |
| Liquiritigenin-7,4'-O-diglucoside              | -           | C27H32O14 | [M+H] <sup>+</sup> | 9.14E+04 |
| Epicatechin glucoside                          | -           | C21H24O11 | [M-H] <sup>-</sup> | 9.08E+04 |
| Luteolin-6-C-glucoside (Isoorientin)*          | 4261-42-1   | C21H20O11 | [M-H] <sup>-</sup> | 9.07E+04 |
| Tectochrysin                                   | 520-28-5    | C16H12O4  | [M+H] <sup>+</sup> | 9.01E+04 |
| Quercetin-7-O-(6"-malonyl)glucoside*           | -           | C24H22O15 | [M+H] <sup>+</sup> | 8.43E+04 |
| Irilin D                                       | 204590-67-0 | C16H12O7  | [M+H] <sup>+</sup> | 8.42E+04 |
| Prunetin (5,4'-Dihydroxy-7-methoxyisoflavone)  | 552-59-0    | C16H12O5  | [M-H] <sup>-</sup> | 8.41E+04 |
| Apigenin                                       | 520-36-5    | C15H10O5  | [M+H] <sup>+</sup> | 8.28E+04 |
| Isorhamnetin-3,7-O-diglucoside                 | 6758-51-6   | C28H32O17 | [M+H] <sup>+</sup> | 8.27E+04 |
| Butin-7-O-glucoside                            | -           | C21H22O10 | [M-H] <sup>-</sup> | 8.23E+04 |
| Pinocembrin (Dihydrochrysin)                   | 480-39-7    | C15H12O4  | [M-H] <sup>-</sup> | 8.15E+04 |
| 6-Methylflavone                                | 29976-75-8  | C16H12O2  | [M+H] <sup>+</sup> | 7.88E+04 |
| Trifolirhizin (Maackiain-3-O-glucoside)        | 6807-83-6   | C22H22O10 | [M-H] <sup>-</sup> | 7.81E+04 |
| Chrysoeriol-6,8-di-C-glucoside                 | -           | C28H32O16 | [M+H] <sup>+</sup> | 7.54E+04 |
| 6-Hydroxykaempferol-7,6-O-Diglucoside          | -           | C27H30O17 | [M+H] <sup>+</sup> | 7.49E+04 |
| Isorhamnetin                                   | 480-19-3    | C16H12O7  | [M-H] <sup>-</sup> | 7.49E+04 |
| Luteolin-7-O-(2"-O-rhamnosyl)rutinoside        | -           | C33H40O19 | [M+H] <sup>+</sup> | 7.45E+04 |

|                                                 |              |           |                    |          |
|-------------------------------------------------|--------------|-----------|--------------------|----------|
| 3-Methylkaempferol                              | 1592-70-7    | C16H12O6  | [M+H] <sup>+</sup> | 7.39E+04 |
| Isohemiphloin                                   | 3682-02-8    | C21H22O10 | [M-H] <sup>-</sup> | 7.29E+04 |
| Dihydrocharcone-4'-O-glucoside                  | -            | C21H24O10 | [M-H] <sup>-</sup> | 7.12E+04 |
| Eriodictyol-8-C-glucoside                       | 1023271-51-3 | C21H22O11 | [M-H] <sup>-</sup> | 7.01E+04 |
| Naringenin-4'-O-glucoside*                      | -            | C21H22O10 | [M-H] <sup>-</sup> | 6.91E+04 |
| Phellamurin                                     | 52589-11-4   | C26H30O11 | [M+H] <sup>+</sup> | 6.89E+04 |
| 3',4',7-Trihydroxyflavone                       | 2150-11-0    | C15H10O5  | [M+H] <sup>+</sup> | 6.85E+04 |
| Sexangularetin-3-O-glucoside-7-O-rhamnoside     | -            | C28H32O16 | [M+H] <sup>+</sup> | 6.52E+04 |
| Apigenin-5-O-glucoside*                         | 28757-27-9   | C21H20O10 | [M+H] <sup>+</sup> | 6.49E+04 |
| Apigenin-6-C-arabinoside-8-C-xyloside           | -            | C25H26O13 | [M+H] <sup>+</sup> | 6.41E+04 |
| Luteolin-7-O-glucoside-5-O-arabinoside          | -            | C26H28O15 | [M+H] <sup>+</sup> | 6.34E+04 |
| Myricetin                                       | 529-44-2     | C15H10O8  | [M+H] <sup>+</sup> | 6.25E+04 |
| Apigenin-6,8-di-C-arabinoside                   | -            | C25H26O13 | [M+H] <sup>+</sup> | 6.22E+04 |
| Phloretin-2'-O-glucoside (Phlorizin)            | 60-81-1      | C21H24O10 | [M-H] <sup>-</sup> | 6.20E+04 |
| Apigenin-7-O-(6"-malonyl)glucoside              | 86546-87-4   | C24H22O13 | [M+H] <sup>+</sup> | 6.07E+04 |
| 3,7-Di-O-methylquercetin                        | 2068-02-2    | C17H14O7  | [M-H] <sup>-</sup> | 5.83E+04 |
| Kaempferol-3-O-robinoside-7-O-rhamnoside        |              |           |                    |          |
| (Robinin)                                       | 301-19-9     | C33H40O19 | [M+H] <sup>+</sup> | 5.64E+04 |
| Tamarixetin-3-O-rutinoside                      | -            | C28H32O16 | [M-H] <sup>-</sup> | 5.61E+04 |
| Isorhamnetin-3-O-rutinoside (Narcissin)         | 604-80-8     | C28H32O16 | [M+H] <sup>+</sup> | 5.54E+04 |
| Chrysoeriol-5,7-di-O-glucoside                  | -            | C28H32O16 | [M+H] <sup>+</sup> | 5.45E+04 |
| Genistein-8-C-apisoyl(1→6)glucoside             | -            | C26H28O14 | [M+H] <sup>+</sup> | 5.40E+04 |
| Glisoflavone                                    | 125709-32-2  | C21H20O6  | [M+H] <sup>+</sup> | 5.24E+04 |
| Apigenin-7-O-glucoside(Cosmosiin)*              | 578-74-5     | C21H20O10 | [M-H] <sup>-</sup> | 4.96E+04 |
| Baicalein                                       | 491-67-8     | C15H10O5  | [M+H] <sup>+</sup> | 4.92E+04 |
| Chrysin-5-O-glucoside (Toringin)                | 1329-10-8    | C21H20O9  | [M+H] <sup>+</sup> | 4.76E+04 |
| Laciniatin-7-O-Gentiobioside                    | -            | C29H34O18 | [M+H] <sup>+</sup> | 4.67E+04 |
| Luteolin-7-O-(6"-sinapoyl)glucoside             | -            | C32H30O15 | [M+H] <sup>+</sup> | 4.67E+04 |
| 2'-Hydroxy,5-methoxyGenistein-O-rhamnosyl       |              |           |                    |          |
| -glucoside                                      | -            | C28H32O16 | [M+H] <sup>+</sup> | 4.43E+04 |
| 3,4',5,6,7-Pentamethoxyflavone                  | 4472-73-5    | C20H20O7  | [M+H] <sup>+</sup> | 4.41E+04 |
| Gallocatechin 3-O-gallate*                      | 5127-64-0    | C22H18O11 | [M-H] <sup>-</sup> | 4.30E+04 |
| Epicatechin*                                    | 490-46-0     | C15H14O6  | [M+H] <sup>+</sup> | 4.18E+04 |
| Chrysoeriol-7-O-(2"-O-glucuronyl)glucoside      | -            | C28H30O17 | [M+H] <sup>+</sup> | 4.13E+04 |
| 7-Hydroxy-2',5,8-Trimethoxyflavanone            | -            | C18H18O6  | [M+H] <sup>+</sup> | 4.03E+04 |
| Chrysoeriol-6,8-di-C-glucoside-4'-O-glucoside   | -            | C34H42O21 | [M+H] <sup>+</sup> | 3.88E+04 |
| Acacetin-7-O-glucoside (Tilianin)               | 4291-60-5    | C22H22O10 | [M+H] <sup>+</sup> | 3.87E+04 |
| Quercetin-7-O-rutinoside-4'-O-glucoside         | -            | C33H40O21 | [M+H] <sup>+</sup> | 3.86E+04 |
| Baicalin                                        | 21967-41-9   | C21H18O11 | [M+H] <sup>+</sup> | 3.79E+04 |
| Kaempferol-3-O-sulfonate                        | -            | C15H10O9S | [M-H] <sup>-</sup> | 3.75E+04 |
| Dihydroxy-dimethoxyflavone                      | -            | C17H14O6  | [M+H] <sup>+</sup> | 3.65E+04 |
| Isorhamnetin-3-O-rutinoside-4'-O-glucoside      | 111393-97-6  | C34H42O21 | [M+H] <sup>+</sup> | 3.54E+04 |
| 5,4'-Dihydroxy-7-methoxyflavanone (Sakuranetin) | 2957-21-3    | C16H14O5  | [M+H] <sup>+</sup> | 3.50E+04 |
| Isorhamnetin-3-O-sophoroside-7-O-rhamnoside     | 41328-75-0   | C34H42O21 | [M+H] <sup>+</sup> | 3.31E+04 |

|                                                          |             |           |                    |          |
|----------------------------------------------------------|-------------|-----------|--------------------|----------|
| 6-Hydroxykaempferol-3-O-rutin-6-O-glucoside              | -           | C33H40O21 | [M+H] <sup>+</sup> | 3.23E+04 |
| Swertijaponin                                            | 6980-25-2   | C22H22O11 | [M+H] <sup>+</sup> | 3.22E+04 |
| Daidzein                                                 | 486-66-8    | C15H10O4  | [M+H] <sup>+</sup> | 3.11E+04 |
| Apigenin-6-C-(2"-glucuronyl)xyloside                     | -           | C26H26O15 | [M+H] <sup>+</sup> | 3.06E+04 |
| Kaempferol-3-O-(6"-p-Coumaroyl)glucoside                 |             |           |                    |          |
| (Tilioside)*                                             | 20316-62-5  | C30H26O13 | [M-H] <sup>-</sup> | 3.01E+04 |
| Dihydrokaempferol (Aromadendrin)                         | 480-20-6    | C15H12O6  | [M-H] <sup>-</sup> | 3.01E+04 |
| Luteolin-7-O-gentiobioside                               | -           | C27H30O16 | [M+H] <sup>+</sup> | 2.96E+04 |
| Kaempferol-7-O-rhamnoside*                               | 20196-89-8  | C21H20O10 | [M-H] <sup>-</sup> | 2.81E+04 |
| Isolicoflavonol                                          | 94805-83-1  | C20H18O6  | [M+H] <sup>+</sup> | 2.79E+04 |
| 3',4'-Dihydroxy-7,5'-dimethoxyflavone                    | -           | C17H14O6  | [M+H] <sup>+</sup> | 2.79E+04 |
| Apigenin-7,4'-di-O-Glucoside                             | -           | C27H30O15 | [M+H] <sup>+</sup> | 2.65E+04 |
| Avicularin(Quercetin-3-O- $\alpha$ -L-arabinofuranoside) | 572-30-5    | C20H18O11 | [M+H] <sup>+</sup> | 2.58E+04 |
| 2'-Hydroxy,5-methoxyGenistein-4',7-O-diglucoside         | -           | C28H32O17 | [M+H] <sup>+</sup> | 2.51E+04 |
| Kaempferol-3-O-sophorotrioside-7-O-glucoside             | -           | C39H50O26 | [M+H] <sup>+</sup> | 2.35E+04 |
| 3'-Methoxydaidzin                                        | 200127-80-6 | C22H22O10 | [M+H] <sup>+</sup> | 2.32E+04 |
| Tamarixetin (3,3',5,7-Tetrahydroxy-4'-                   |             |           |                    |          |
| Methoxyflavone)                                          | 603-61-2    | C16H12O7  | [M+H] <sup>+</sup> | 2.31E+04 |
| Syringetin                                               | 4423-37-4   | C17H14O8  | [M-H] <sup>-</sup> | 2.30E+04 |
| Isolicoricone*                                           | -           | C22H22O6  | [M+H] <sup>+</sup> | 2.28E+04 |
| Quercetagenin-4'-Methyl Ether                            | -           | C16H12O8  | [M-H] <sup>-</sup> | 2.25E+04 |
| Mearnsetin-3-O-glucoside                                 | -           | C22H22O13 | [M-H] <sup>-</sup> | 2.22E+04 |
| Kaempferol-3-O-(6"-p-Coumaroyl)galactoside*              | -           | C30H26O13 | [M+H] <sup>+</sup> | 2.15E+04 |
| Sophoricoside                                            | 152-95-4    | C21H20O10 | [M-H] <sup>-</sup> | 2.12E+04 |
| Tricetin (5,7,3',4',5'-Pentahydroxyflavone)              | 520-31-0    | C15H10O7  | [M-H] <sup>-</sup> | 2.05E+04 |
| Luteolin-6-C-(2"-glucuronyl)glucoside                    | -           | C27H28O17 | [M+H] <sup>+</sup> | 2.02E+04 |
| Farrerol-5,7-di-O-glucoside                              | -           | C29H36O15 | [M-H] <sup>-</sup> | 1.90E+04 |
| Laricitrin                                               | 53472-37-0  | C16H12O8  | [M-H] <sup>-</sup> | 1.88E+04 |
| Farrerol (6,8-Dimethyl-5,7,4'-trihydroxyflavanone)       | 24211-30-1  | C17H16O5  | [M+H] <sup>+</sup> | 1.82E+04 |
| Biochanin A                                              | 491-80-5    | C16H12O5  | [M+H] <sup>+</sup> | 1.77E+04 |
| Tricin (5,7,4'-Trihydroxy-3',5'-dimethoxyflavone)        | 520-32-1    | C17H14O7  | [M+H] <sup>+</sup> | 1.71E+04 |
| Salvigenin                                               | 19103-54-9  | C18H16O6  | [M+H] <sup>+</sup> | 1.69E+04 |
| Rhamnetin                                                | 90-19-7     | C16H12O7  | [M-H] <sup>-</sup> | 1.67E+04 |
| 8-Prenylkaempferol                                       | 28610-31-3  | C20H18O6  | [M+H] <sup>+</sup> | 1.58E+04 |
| 5-Hydroxy-6,7,3',4'-tetramethoxyflavone                  | 21763-80-4  | C19H18O7  | [M+H] <sup>+</sup> | 1.27E+04 |
| 5,7,4',5'-Tetrahydro-3',6-dimethoxyflavone               | -           | C17H14O8  | [M+H] <sup>+</sup> | 1.22E+04 |
| Luteolin-7-O-(6"-eudesmyl)glucoside                      | -           | C31H30O15 | [M-H] <sup>-</sup> | 1.20E+04 |
| Azaleatin (5-O-Methylquercetin)                          | 529-51-1    | C16H12O7  | [M+H] <sup>+</sup> | 1.05E+04 |
| 4',5,7-Trihydroxy-6,8-dimethyl-homoisoflavanone          | -           | C18H16O5  | [M-H] <sup>-</sup> | 1.04E+04 |
| Acacetin                                                 | 480-44-4    | C16H12O5  | [M+H] <sup>+</sup> | 1.03E+04 |
| Kumatakenin                                              | 3301-49-3   | C17H14O6  | [M-H] <sup>-</sup> | 1.01E+04 |
| 6-Hydroxykaempferol-3,7,6-O-triglycoside                 | -           | C33H40O22 | [M+H] <sup>+</sup> | 9.66E+03 |
| 5,4'-Dihydroxy-3,6,7,3'-tetramethoxyflavone              | 130252-52-7 | C19H18O8  | [M+H] <sup>+</sup> | 9.30E+03 |
| Ayanin (3',5-Dihydroxy-3,4',7-Trimethoxyflavone)         | 572-32-7    | C18H16O7  | [M+H] <sup>+</sup> | 7.70E+03 |

|                                                          |            |          |                    |          |
|----------------------------------------------------------|------------|----------|--------------------|----------|
| Pachypodol (5,4'-dihydroxy-3,7,3'-<br>trimethoxyflavone) | 33708-72-4 | C18H16O7 | [M+H] <sup>+</sup> | 6.85E+03 |
| Isosinensetin                                            | 17290-70-9 | C20H20O7 | [M+H] <sup>+</sup> | 6.72E+03 |
| 5,6,7,4'-Tetramethoxyflavone                             | 1168-42-9  | C19H18O6 | [M+H] <sup>+</sup> | 6.13E+03 |
| 3',4',5',5,7-Pentamethoxyflavone                         | 53350-26-8 | C20H20O7 | [M+H] <sup>+</sup> | 5.89E+03 |
| Apigenin-7,4'-dimethyl ether                             | 5128-44-9  | C17H14O5 | [M+H] <sup>+</sup> | 5.23E+03 |
| Wogonin (5,7-Dihydroxy-8-Methoxyflavone)                 | 632-85-9   | C16H12O5 | [M+H] <sup>+</sup> | 5.10E+03 |
| 3,5,6,7,8,3',4'-Heptamethoxyflavone                      | 1178-24-1  | C22H24O9 | [M+H] <sup>+</sup> | 4.64E+03 |
| Sinensetin                                               | 2306-27-6  | C20H20O7 | [M+H] <sup>+</sup> | 3.56E+03 |
| 5-Hydroxy-6,7,8,3',4'-pentamethoxyflavone                | 2174-59-6  | C20H20O8 | [M+H] <sup>+</sup> | 3.40E+03 |
| Genkwanin (Apigenin 7-methyl ether)                      | 437-64-9   | C16H12O5 | [M+H] <sup>+</sup> | 2.72E+03 |
| 5-Hydroxy-3,7,4'-trimethoxyflavone                       | -          | C18H16O6 | [M+H] <sup>+</sup> | 2.55E+03 |

---
